# Supplementary material
Source: PubMed Central journal article supplement (PMC4416219)

Supplemental Fig. 1

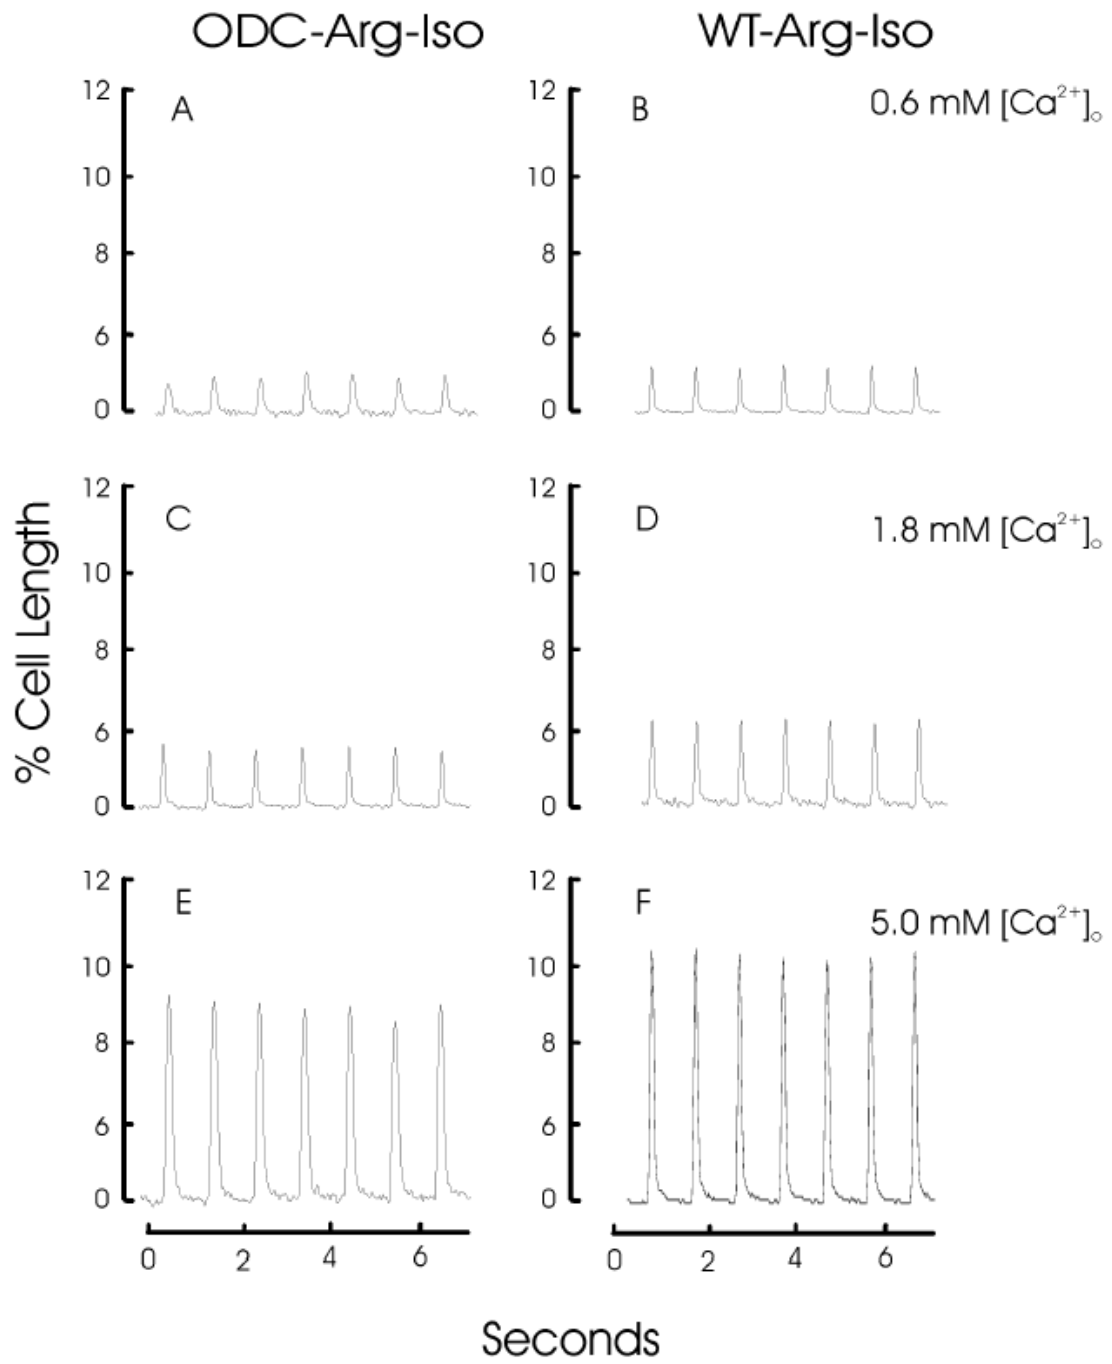

Supplemental Fig. 2

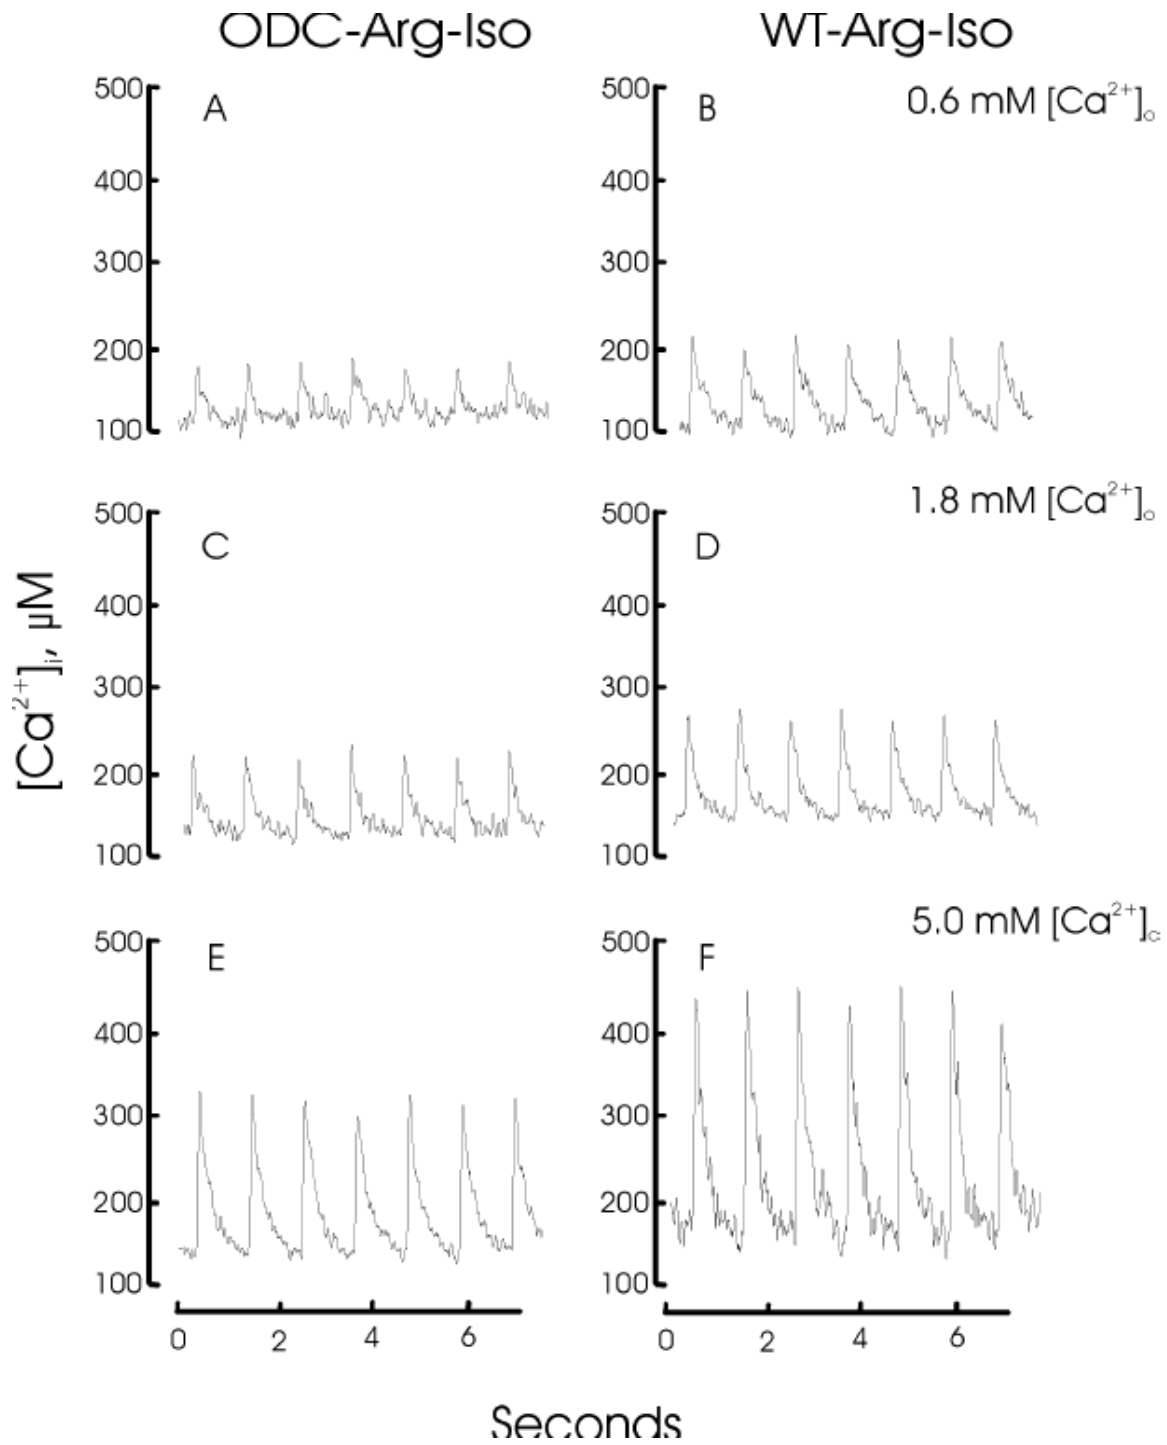

Supplemental Fig. 3

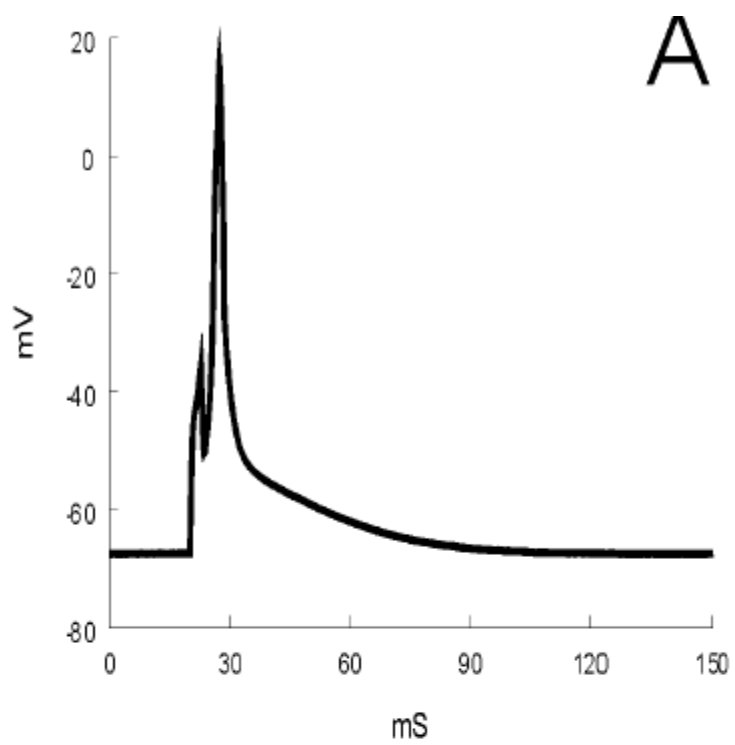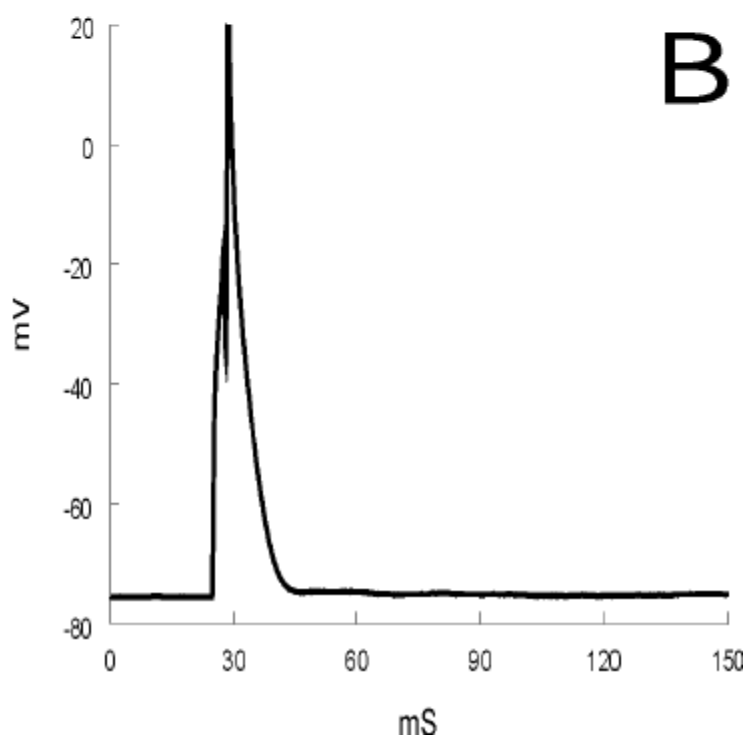

Supplement: NIHMS684022-supplement-01.pdf [file NIHMS684022-supplement-01.pdf]
